# Supplementary material for: Effect of concentration of polyurethane on the anticorrosive property of Vanillin based benzoxazine - A Thermal, Electrochemical and Quantum approach
Source: Research Square preprint supplement (doi:10.21203/rs.3.rs-1963695/v1), 2022-08-22
Supplement: Supplementary file 1 [file 371edaa22def3dea7124d094.docx]

**Effect of concentration of polyurethane on the anticorrosive property of Vanillin based benzoxazine - A Thermal, Electrochemical and Quantum approach**

K. Jayanthi1*, M. Sivaraju2 and P. Shanmugasundaram3

1 Assistant Professor, PG and Research Department of Chemistry, Queen Mary’s College(A), Chennai – 600004, TamilNadu, India.

2 Assistant professor, PG and Research Department of Chemistry, Thiruvalluvar Government Arts College, Rasipuram 637401, TamilNadu, India

3 Head and Associate Professor, PG and Research Department of Chemistry, Thiruvalluvar Government Arts College, Rasipuram 637 401, TamilNadu, India

*Corresponding author: [kjayanthi_che@queenmaryscollege.edu.in](mailto:kjayanthi_che@queenmaryscollege.edu.in)

Graphical Abstract
